# Supplementary material for: Design of Cr3+-activated broadband NIR phosphors with tunable and abnormal thermal quenching behavior for NIR pc-LEDs
Source: Royal Society of Chemistry journal article supplement (doi:10.1039/d4qm00395k), 2024-01-01
Supplement: d4qm00395k1.pdf [file d4qm00395k1.pdf]

## Electronic Supporting Information

### **Design of Cr<sup>3+</sup>-activated broadband NIR phosphors with tunable and abnormal thermal quenching behavior for NIR pc-LEDs**

Qijian Zhu,<sup>†ab</sup> Jiansheng Huo,<sup>†a</sup> Quwei Ni,<sup>ab</sup> Qihong Zhang,<sup>a</sup> Junhao Li,<sup>a</sup> Haiyong Ni<sup>a</sup> and Jianbang Zhou<sup>\*a</sup>

<sup>a</sup> Guangdong Provincial Key Laboratory of Rare Earth Development and Application, Institute of Resources Utilization and Rare Earth Development, Guangdong Academy of Sciences, Guangzhou 510651, P.R. China.

<sup>b</sup> School of Chemistry, Guangzhou Key Laboratory of Analytical Chemistry for Biomedicine, South China Normal University, Guangzhou 510006, P.R. China.

<sup>†</sup> Q.J. Zhu and J.S. Huo contributed equally to this work.

*Corresponding Author.*

*\* E-mail:* zhoujb4079@foxmail.com

**Table S1** Main parameters of  $\text{Lu}_{2.7}\text{Ca}_{0.3}\text{Ga}_{4.7}\text{Si}_{0.3}\text{O}_{12}$  refinement.

| Chemical formula                                                            | Space group  | Cell parameters                                                                             | Volume ( $\text{\AA}^3$ ) | $R_p\%$ | $R_{wp}\%$ |
|-----------------------------------------------------------------------------|--------------|---------------------------------------------------------------------------------------------|---------------------------|---------|------------|
| $\text{Lu}_{2.7}\text{Ca}_{0.3}\text{Ga}_{4.7}\text{Si}_{0.3}\text{O}_{12}$ | $Ia\bar{3}d$ | $a = b = c = 12.18 \text{ (\AA)}$<br>$\alpha = \beta = \gamma = 90 \text{ (}^\circ\text{)}$ | 1807.42                   | 6.00    | 10.23      |

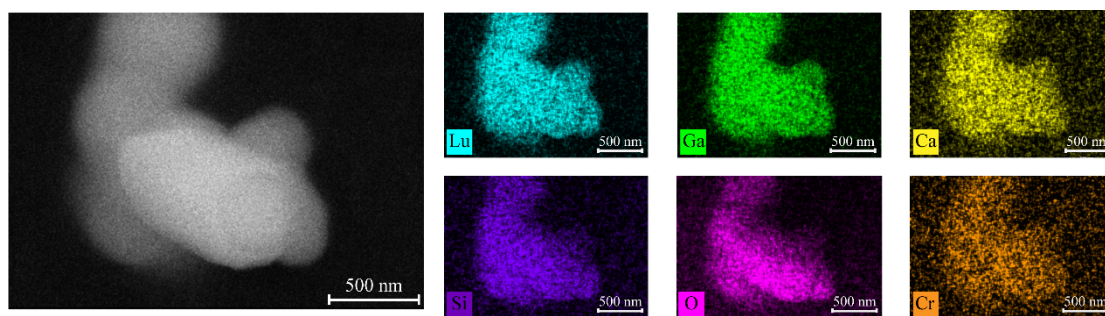

**Fig. S1.** SEM and elemental mapping images of  $\text{Lu}_{2.7}\text{Ca}_{0.3}\text{Ga}_{4.7}\text{Si}_{0.3}\text{O}_{12}:\text{Cr}^{3+}$  phosphor.

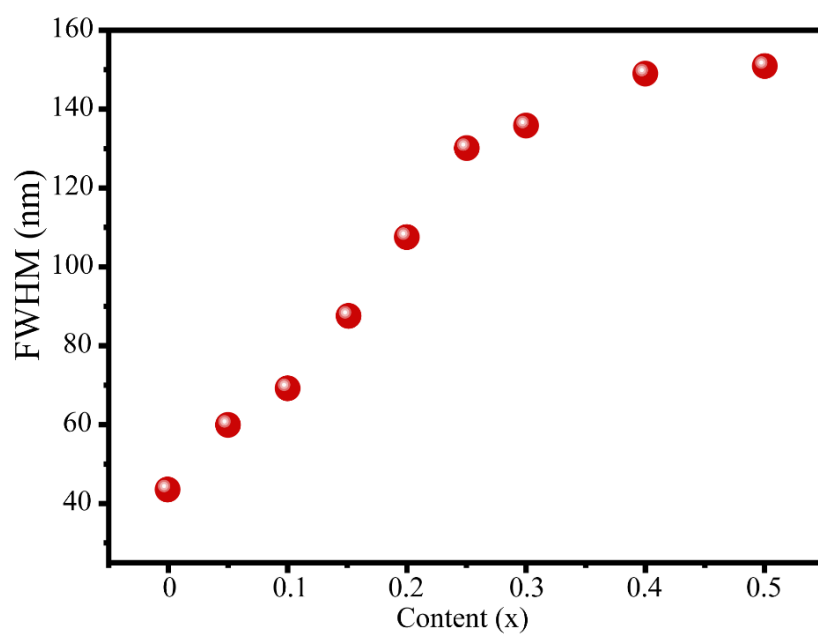

**Fig. S2.** FWHM of  $\text{Lu}_{3-x}\text{Ca}_x\text{Ga}_{5-x}\text{Si}_x\text{O}_{12}:0.01\text{Cr}^{3+}$  ( $x = 0-0.5$ ).

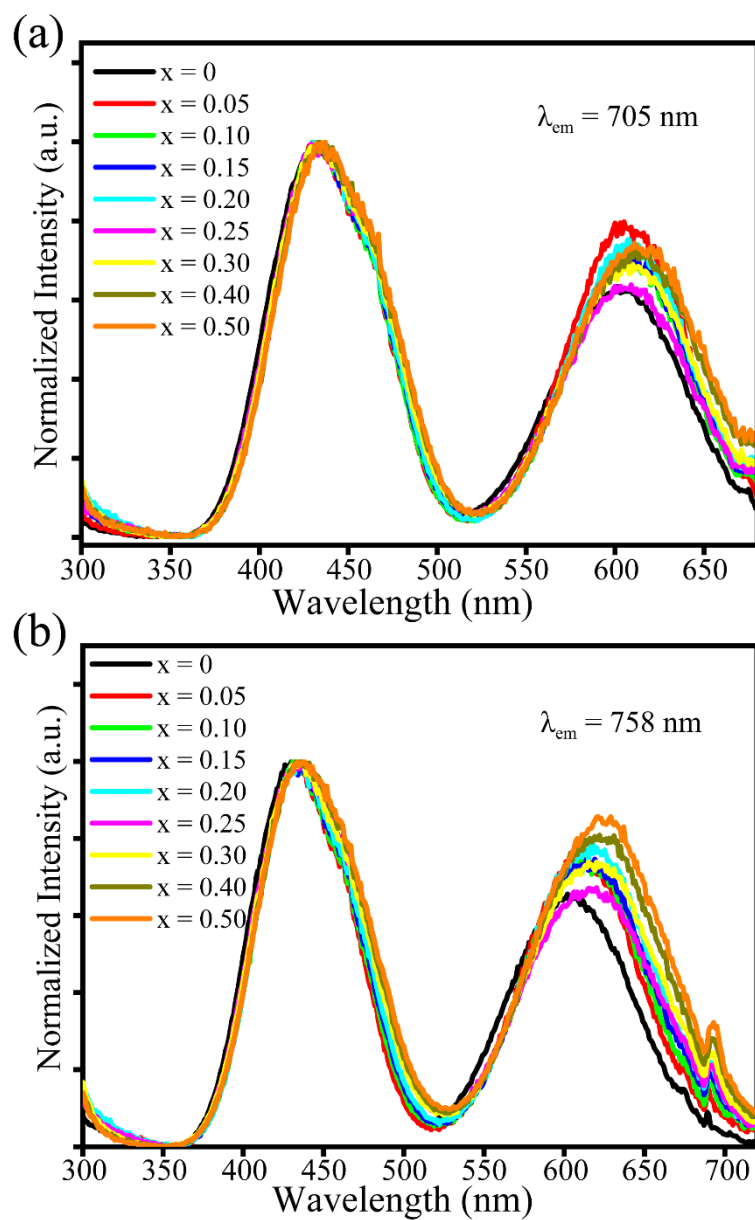

**Fig. S3.** PLE spectra of  $\text{Lu}_{3-x}\text{Ca}_x\text{Ga}_{5-x}\text{Si}_x\text{O}_{12}:0.01\text{Cr}^{3+}$  ( $x = 0-0.5$ ).

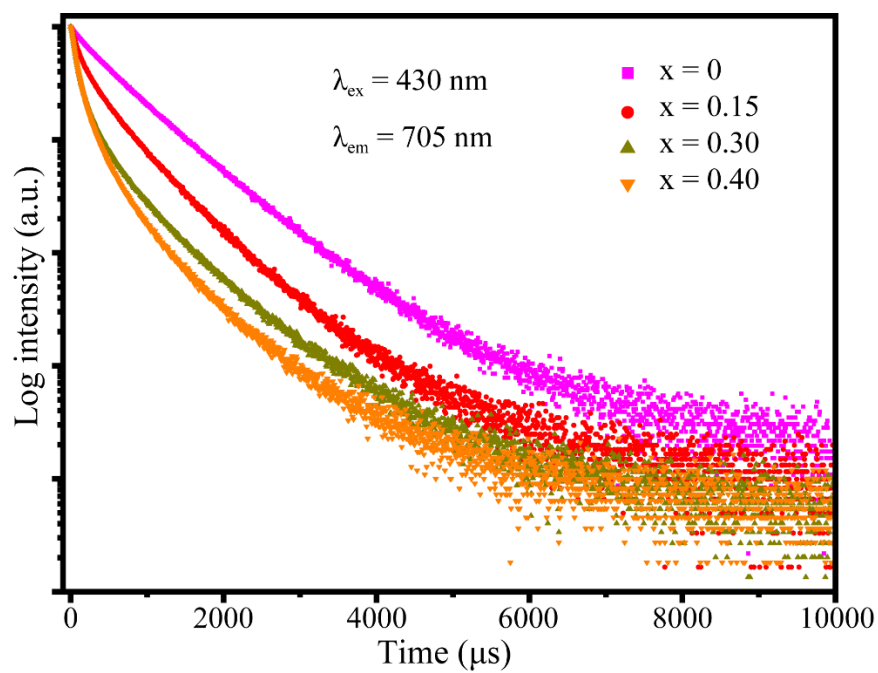

**Fig. S4.** PL decay curves of  $\text{Lu}_{3-x}\text{Ca}_x\text{Ga}_{5-x}\text{Si}_3\text{O}_{12}:0.01\text{Cr}^{3+}$  ( $x = 0-0.4$ ).

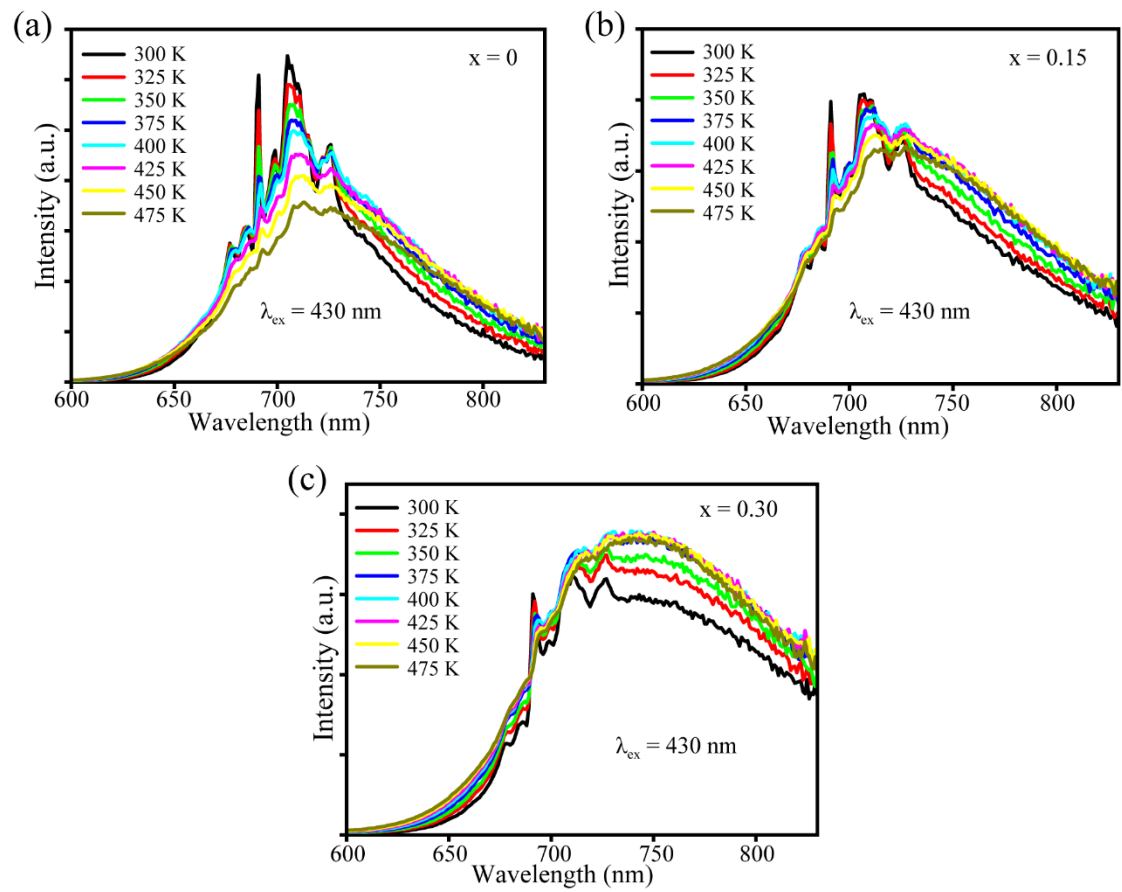

**Fig. S5.** PL spectra of  $\text{Lu}_{3-x}\text{Ca}_x\text{Ga}_{5-x}\text{Si}_8\text{O}_{12}:0.01\text{Cr}^{3+}$  ( $x = 0-0.3$ ) as a function of temperature (300-475 K).

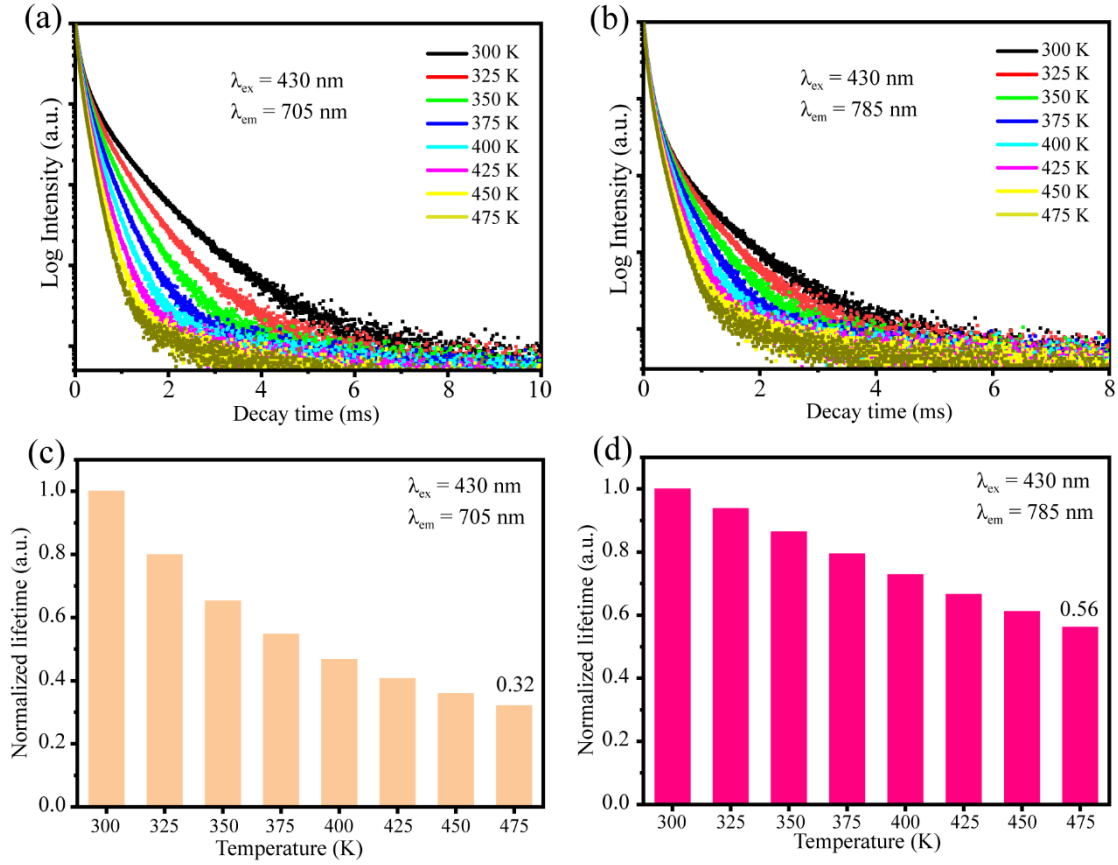

**Fig. S6.** Decay curves of (a)  $^2\text{E} \rightarrow ^4\text{A}_2$  ( $\lambda_{\text{em}} = 705 \text{ nm}$ ) and (b)  $^4\text{T}_2 \rightarrow ^4\text{A}_2$  ( $\lambda_{\text{em}} = 785 \text{ nm}$ ) transitions of  $\text{Lu}_{2.7}\text{Ca}_{0.3}\text{Ga}_{4.7}\text{Si}_{0.3}\text{O}_{12}:\text{Cr}^{3+}$  as a function of temperature. Normalized lifetime (the lifetime at 300 K is set as 1) of (c)  $^2\text{E} \rightarrow ^4\text{A}_2$  ( $\lambda_{\text{em}} = 705 \text{ nm}$ ) and (d)  $^4\text{T}_2 \rightarrow ^4\text{A}_2$  ( $\lambda_{\text{em}} = 785 \text{ nm}$ ) transitions of  $\text{Lu}_{2.7}\text{Ca}_{0.3}\text{Ga}_{4.7}\text{Si}_{0.3}\text{O}_{12}:\text{Cr}^{3+}$  as a function of temperature.

It can be seen from **Fig. S6** that the lifetime of both  $^2\text{E} \rightarrow ^4\text{A}_2$  and  $^4\text{T}_2 \rightarrow ^4\text{A}_2$  transitions decreases with temperature from 300 to 475 K due to enhanced nonradiative transitions. Furthermore, it should be noted that the decrease rate of the lifetime of  $^2\text{E} \rightarrow ^4\text{A}_2$  transition is much higher than that of  $^4\text{T}_2 \rightarrow ^4\text{A}_2$ , which means that the efficiency of electron migration from  $^2\text{E}$  to  $^4\text{T}_2$  states is much higher than the nonradiative  $^4\text{T}_2 \rightarrow ^4\text{A}_2$  transition, indicating that the radiative  $^4\text{T}_2 \rightarrow ^4\text{A}_2$  broadband emission can be possibly strengthened at high temperatures.

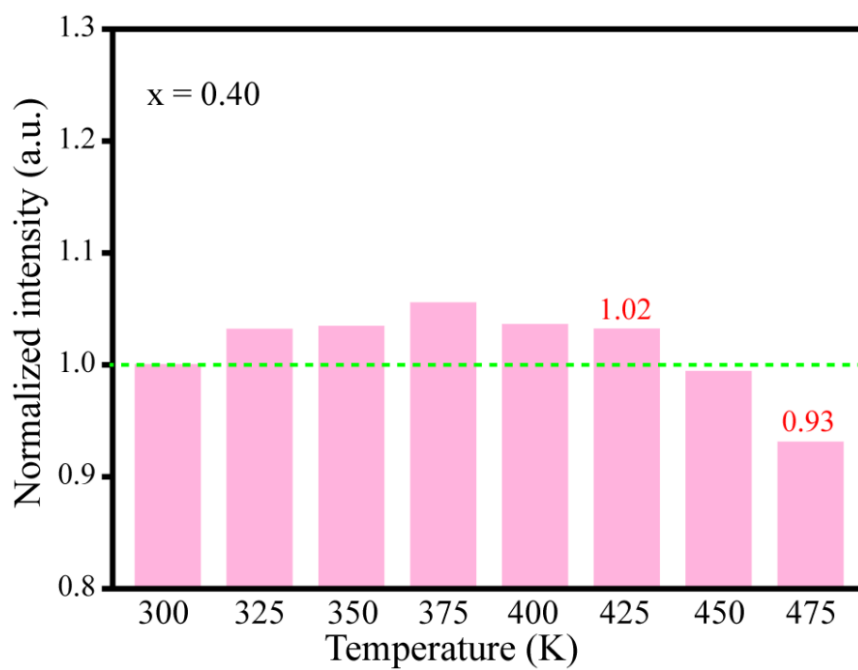

**Fig. S7.** PL intensity of  $\text{Lu}_{2.6}\text{Ca}_{0.4}\text{Ga}_{4.6}\text{Si}_{0.4}\text{O}_{12}:0.01\text{Cr}^{3+}$  ( $x = 0.40$ ) as a function of temperature (300-475 K).

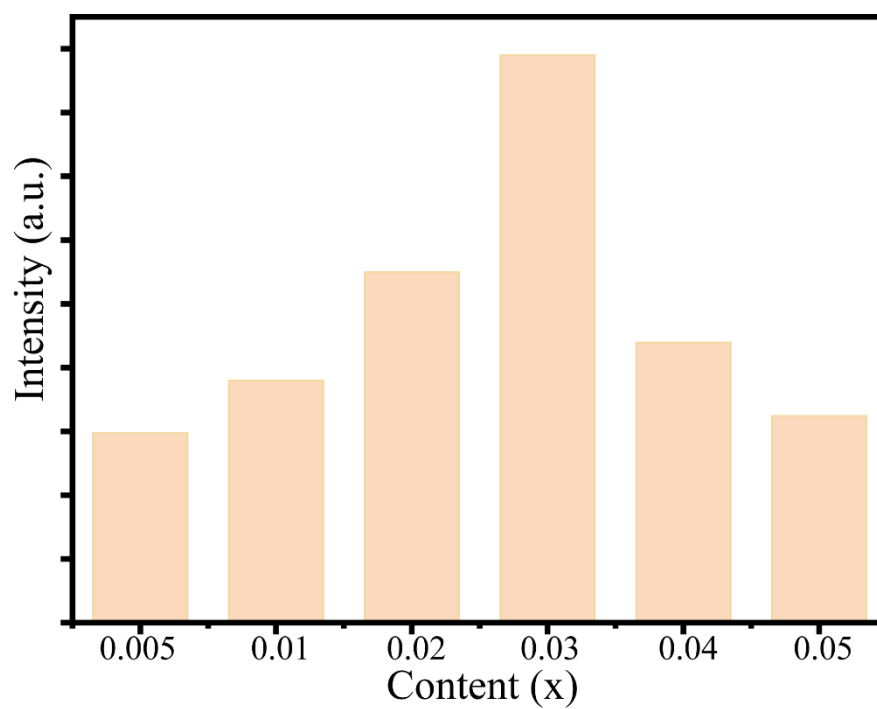

**Fig. S8.** PL intensity of  $\text{Lu}_{3-x}\text{Ca}_x\text{Ga}_{5-x}\text{Si}_x\text{O}_{12}:0.01\text{Cr}^{3+}$  ( $x = 0-0.5$ ).

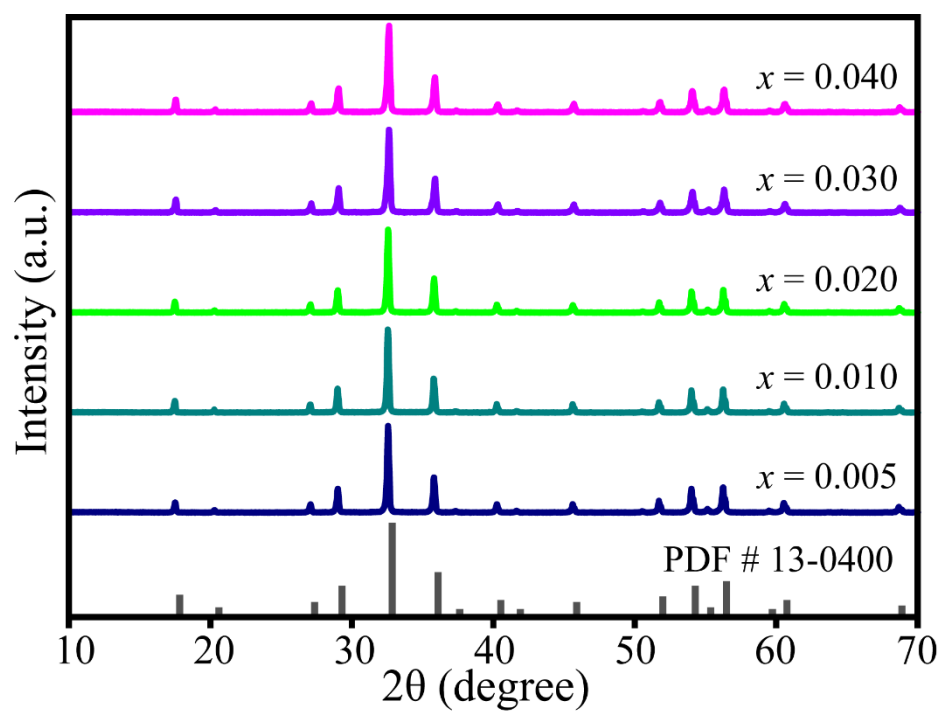

**Fig. S9.** XRD patterns of  $\text{Lu}_{2.7}\text{Ca}_{0.3}\text{Ga}_{4.7-x}\text{Si}_{0.3}\text{O}_{12}:x\text{Cr}^{3+}$  ( $x = 0.005\text{--}0.040$ ).

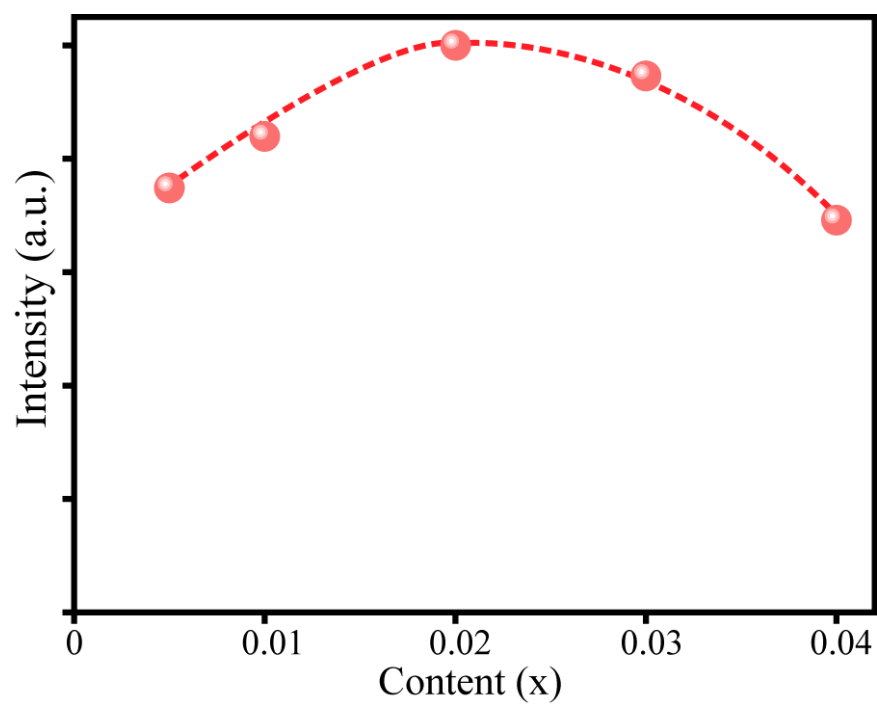

**Fig. S10.** PL intensity of  $\text{Lu}_{2.7}\text{Ca}_{0.3}\text{Ga}_{4.7-x}\text{Si}_{0.3}\text{O}_{12}:x\text{Cr}^{3+}$  ( $x = 0.005\text{-}0.040$ ).

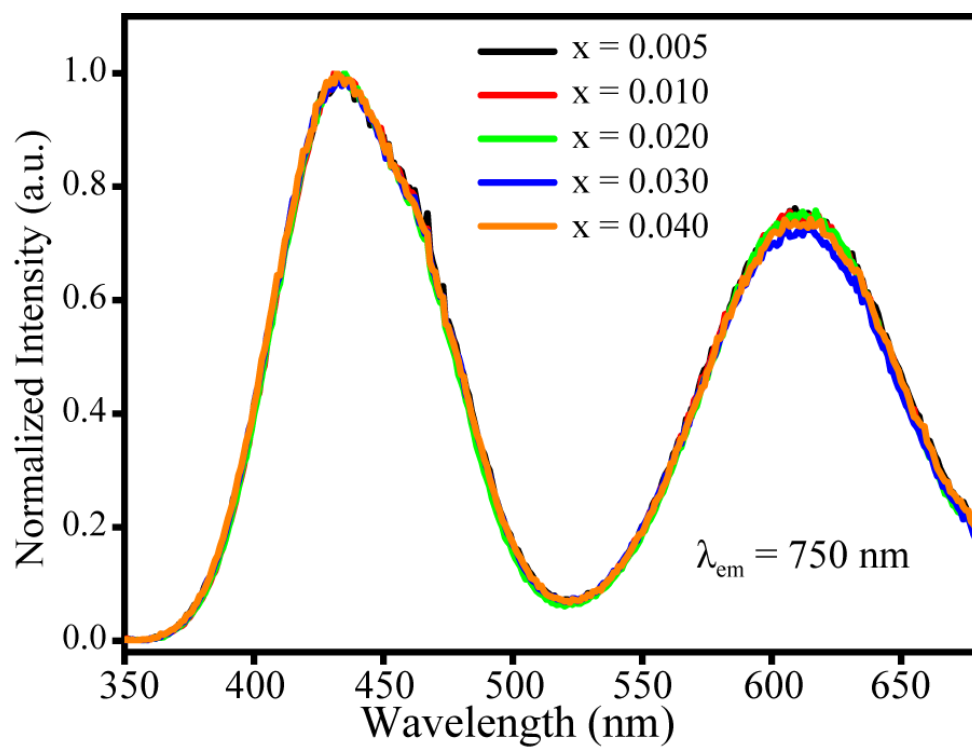

**Fig. S11.** PLE spectra of  $\text{Lu}_{2.7}\text{Ca}_{0.3}\text{Ga}_{4.7-x}\text{Si}_{0.3}\text{O}_{12}:x\text{Cr}^{3+}$  ( $x = 0.005\text{-}0.040$ ).

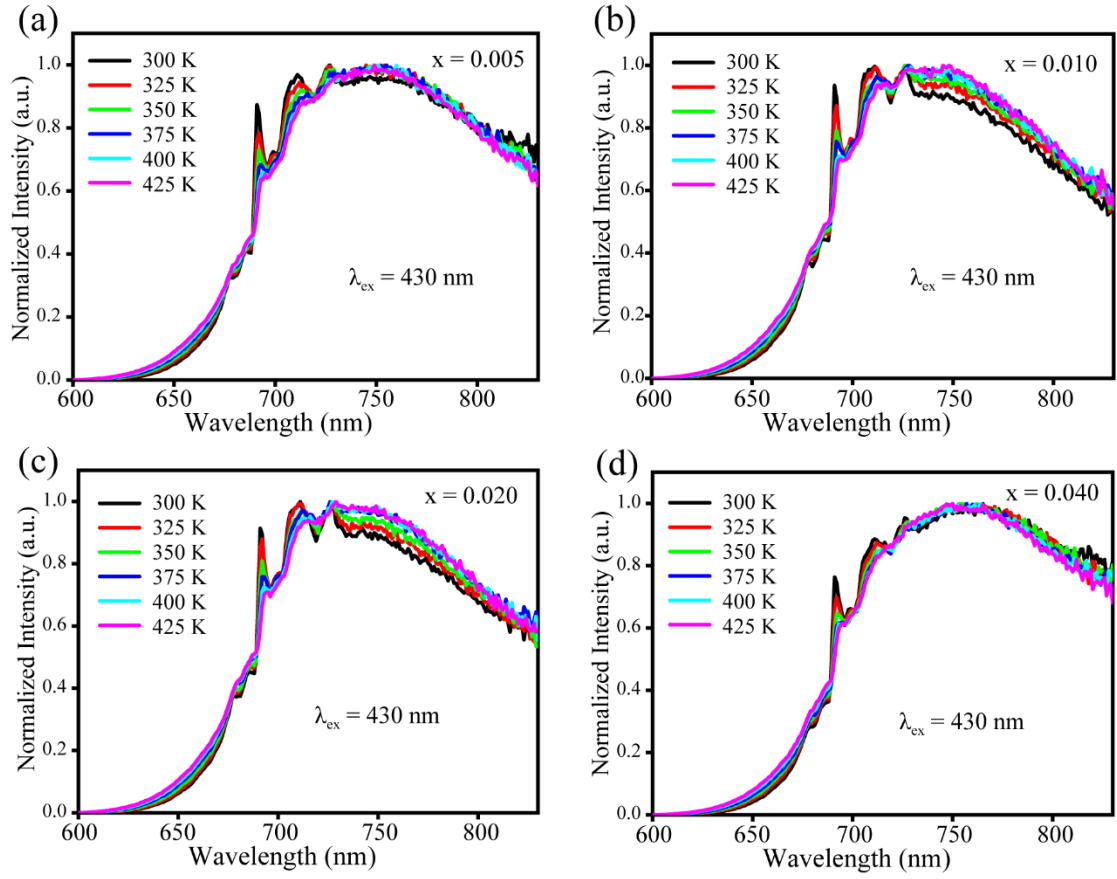

**Fig. S12.** PL spectra of  $\text{Lu}_{2.7}\text{Ca}_{0.3}\text{Ga}_{4.7-x}\text{Si}_{0.3}\text{O}_{12}:\text{xCr}^{3+}$  ( $x = 0.005\text{-}0.040$ ) as a function of temperature (300-425 K).

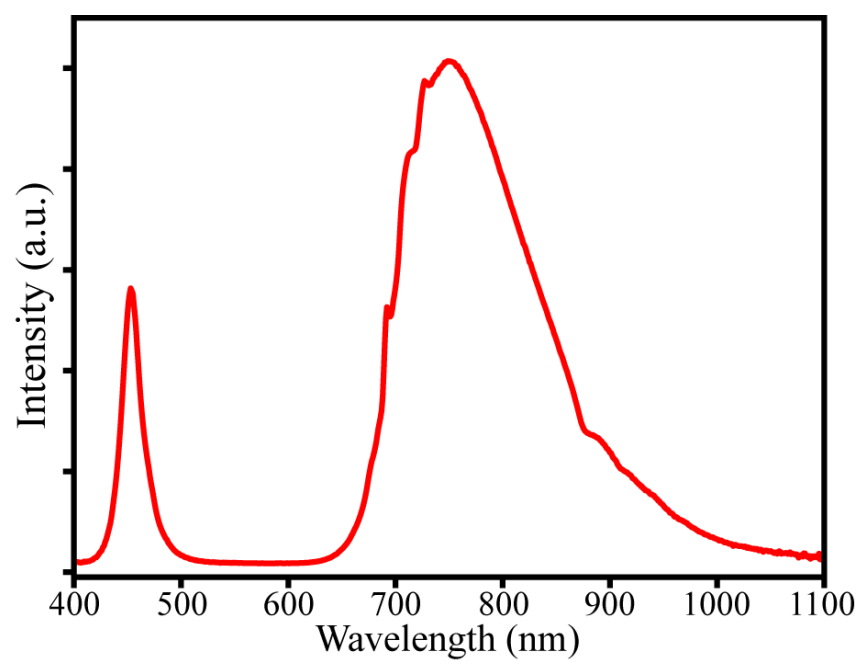

**Fig. S13.** Electroluminescence spectrum of the fabricated NIR-LED device (300 mA).
